# Supplementary material for: Cutaneous vasculitis and vasculopathy in the era of COVID-19 pandemic
Source: PubMed Central journal article supplement (PMC9445267; doi:10.3389/fmed.2022.996288), 2022-08-23
Supplement: Data_Sheet_1.pdf [file Data_Sheet_1.pdf]

## Supplementary Materials

### Supplementary Figure legends.

**Supplementary Figure 1.** Classic, palpable non-blanchable purpura involving the legs (a, upper left) and buttocks (b, upper right) in a patient with small-vessel cutaneous vasculitis. Haemorrhagic blisters (c, lower left) in a patient with skin-limited IgA vasculitis. Infiltrated, polycyclic wheal-like lesions lasting more the 24 hours in a patient with urticarial vasculitis (d, lower right).

**Supplementary Table 1.** Cases of histologically confirmed cutaneous leukocytoclastic vasculitis in COVID-19 patients

| Ref. | Gender, age (years) | Clinical findings                                                                                                                                      | Systemic involvement                    | Autoantibodies                                             | COVID-19 diagnosis (methods)                                                              | Treatment                                                                                           | Time to resolution                           | Outcome                                                                                                                                     |
|------|---------------------|--------------------------------------------------------------------------------------------------------------------------------------------------------|-----------------------------------------|------------------------------------------------------------|-------------------------------------------------------------------------------------------|-----------------------------------------------------------------------------------------------------|----------------------------------------------|---------------------------------------------------------------------------------------------------------------------------------------------|
| (12) | M, 79               | Haemorrhagic vesiculobullous eruption on neck and dorsal areas of hands                                                                                | Fever and dyspnea                       | Negative                                                   | Nasopharyngeal swab RT- PCR                                                               | Intravenous CS                                                                                      | NA                                           | Death for respiratory insufficiency                                                                                                         |
| (13) | M, 59               | Symmetrical distributed maculopapular purpuric exanthema on the face, trunk and extremities                                                            | Neurological complications              | Negative                                                   | Throat swab RT-PCR                                                                        | NA                                                                                                  | NA                                           | NA                                                                                                                                          |
| (14) | M, 29               | Purple palpable papules and serohaematic blisters on the abdomen, buttocks and both lower legs                                                         | Myalgia, abdominal pain, diarrhea       | ANA 1/40                                                   | Positive SARS-CoV-2 PCR from skin biopsy                                                  | CS                                                                                                  | 15 days                                      | Recovery                                                                                                                                    |
| (15) | M, 47               | Small red to violaceous plaques on the legs and extended to the arms and trunk                                                                         | Fever arthralgia, oral lesions          | Negative                                                   | Positive RT-PCR                                                                           | Topical betamethasone valerate 0.12% cream twice daily                                              | NA                                           | NA                                                                                                                                          |
| (16) | F, 71               | Purpuric macules and papules in both legs, extending from the ankle and up to the thigh                                                                | No                                      | Negative                                                   | Positive rRT-PCR for SARS-CoV-2 from nasopharyngeal swab                                  | Betamethasone dipropionate 0.05% cream                                                              | 3 weeks                                      | Recovery                                                                                                                                    |
| (17) | F, 83               | Purple palpable papules and serohaematic blisters on lower legs, feet and toes                                                                         | No                                      | IgM cardiolipin antibodies slightly increased              | Serological qualitative rapid testing for SARS- CoV-2 positive for IgM and IgG antibodies | 30 mg/day prednisone                                                                                | NA                                           | Recovery                                                                                                                                    |
| (18) | M, 49               | Purpuric lesions on flexor and extensor parts of both legs and thighs and lower abdomen                                                                | No                                      | Negative                                                   | Positive SARS-Cov 2 test *                                                                | NA                                                                                                  | NA                                           | NA                                                                                                                                          |
| (19) | M, 41               | Purpuric lesions on legs and livedo reticularis                                                                                                        | Cardiac,renal, coagulation profile      | Positive Lupus anti-coagulant                              | Positive SARS-CoV-2 test from nasopharyngeal swab*                                        | IGIV                                                                                                | NA                                           | Dry gangrene and amputation of the left big toe                                                                                             |
| (20) | M,13                | Rashes over the lower limbs                                                                                                                            | No                                      | Mildly elevated IgA                                        | Positive RT-PCR test from nasopharyngeal swab 1 month prior to presentation               | Oral prednisolone (1 mg/kg per day) for 2 weeks followed by gradual tapering over the next 4 weeks. | 4 weeks                                      | Recovery                                                                                                                                    |
| (21) | M,64                | Purpuric macules, papules, and bullae involving his lower extremities with initial aspects of central ulceration and necrosis                          | No                                      | Negative                                                   | positive SARS-Cov 2 test *                                                                | Oral prednisone, high-dose IVIG                                                                     | NA                                           | Death two weeks later due to heath failure                                                                                                  |
| (22) | M,27                | Tense vesiculobullous and purpuric lesions over bilateral lower extremities                                                                            | No                                      | Negative                                                   | Positive rRT-PCR for SARS-CoV-2 from nasopharyngeal swab                                  | Prednisone 1mg/kg/day                                                                               | NA                                           | Recovery                                                                                                                                    |
| (23) | M, 66               | Purplish palpable purpuric papules, some of which with a necrotic center and erythematous maculo- papular lesions on the legs and forearms bilaterally | Abdominal pain, arthralgia, and fatigue | Negative                                                   | Positive RT-PCR test from nasopharyngeal swab                                             | Systemic CS (1 mg/ kg per day) and antihistamines.                                                  | Complete resolution occurred within 2 weeks. | Recovery                                                                                                                                    |
| (24) | F, 32               | Multiple erythematous to violaceous macules and papules over her bilateral lower extremities involving the dorsum of her feet                          | No                                      | Antinuclear antibody was detected at high titers of 1:2560 | Nasopharyngeal swab RT- PCR                                                               | IVIG                                                                                                | NA                                           | Recovery                                                                                                                                    |
| (25) | M,93                | Purpuric macules and papules on the legs, hands, and periumbilical area                                                                                | Legs, feet, and hands were swollen      | Negative                                                   | Nasopharyngeal swab RT- PCR                                                               | Intravenous methylprednisolone (125 mg daily for three days), clobetasol propionate cream           | NA                                           | Dry gangrene of his legs and feet, amputation was declined. The patient died seven weeks after the initial diagnosis of COVID-19 infection. |

M= male; F= female; NA= not available; CS=corticosteroids; IVIG= Intravenous immunoglobulin; rRT-PCR= Real-time reverse transcription polymerase chain reaction; RT-PCR= Real-time transcription polymerase chain reaction; IVIG= intravenous immunoglobulin \*method not specified

**Supplementary Table 2. Cases of cutaneous leukocytoclastic vasculitis caused or reactivated by anti-SARS-CoV-2 vaccination**

| Ref. | Gender, age (years) | Clinical findings                                                                                                                | Time to onset (days) | Time to resolution (weeks) | Which dose                             | Outcome  | Treatment                                                                 | Vaccine type                        |        |
|------|---------------------|----------------------------------------------------------------------------------------------------------------------------------|----------------------|----------------------------|----------------------------------------|----------|---------------------------------------------------------------------------|-------------------------------------|--------|
| (58) | F,46                | Erythematous palpable papules on the legs (previous leukocytoclastic vasculitis)                                                 | 2                    | Several                    | First and second                       | Recovery | Prednisolone 20 mg/day for 2 weeks                                        | Pfizer-BioNTech BNT16B2b2           |        |
| (59) | M,48                | Palpable purpura on both legs                                                                                                    | 4                    | 3                          | Second                                 | Recovery | Systemic antihistamines and local CS                                      | Pfizer-BioNTech BNT16B2b2           |        |
| (60) | M,84                | Palpable purpura on the legs, contemporary herpes zoster of the leg                                                              | 1                    | 2                          | First                                  | Recovery | Famciclovir 500 mg 3/day for 10 days and follow up                        | Pfizer-BioNTech BNT16B2b2           |        |
| (61) | F,57                | Widespread erythematous eruption involving the trunk and extremities                                                             | 7                    | 1                          | First                                  | Recovery | Prednisolone 20 mg/day for 1 week                                         | Pfizer-BioNTech BNT16B2b2           |        |
| (62) | M,65                | Palpable purpuric lesions on the legs                                                                                            | 2                    | Several                    | Third                                  | Recovery | Prednisolone 60 mg/day for 1 week, topical steroid and mupirocin          | Pfizer-BioNTech BNT16B2b2           |        |
| (63) | F,42                | Progressive rash on the lower legs and the gluteal region                                                                        | 4                    | 1                          | First                                  | Recovery | Prednisolone 60 mg/day                                                    | Pfizer-BioNTech BNT16B2b2           |        |
| (64) | F,22                | Purpuric rash on the legs (no biopsy)                                                                                            | 7                    | 3                          | Second                                 | Recovery | Prednisolone 25 mg/day for 1 week, oral antihistamines                    | Pfizer-BioNTech BNT16B2b2           |        |
| (65) | M,83                | Palpable purpura on legs                                                                                                         | 4                    | 2                          | First                                  | Recovery | Methylprednisolone, systemic antihistamines,                              | Pfizer-BioNTech BNT16B2b2           |        |
| (66) | M,76                | Purpuric rash with palpable purpura on both hands, legs, thighs, and abdomen (no biopsy, diagnosed as immune complex vasculitis) | 12                   | 3                          | Second                                 | Recovery | Prednisolone 40 mg/day for 2 weeks                                        | Pfizer-BioNTech BNT16B2b2           |        |
| (67) | F,59                | Purpuric rash involving the lower extremities and abdomen (no biopsy)                                                            | 1                    | NA                         | Second (previous SARS-CoV-2 infection) | Recovery | Oral antihistamines and CS                                                | Moderna mRNA-1273                   |        |
| (68) | M,52                | Ppurpuric rash on the root of the lower limbs                                                                                    | 11                   | NA                         | Second                                 | Recovery | No treatment                                                              | Moderna mRNA-1273                   |        |
| (69) | 20s                 | Skin purpura (diagnosed as immune complex vasculitis)                                                                            | 8                    | /                          | /                                      | Recovery | Local CS                                                                  | Moderna mRNA-1273                   |        |
|      | 60s                 |                                                                                                                                  | 9                    | /                          | /                                      |          | Systemic CS                                                               |                                     |        |
|      | 40s                 |                                                                                                                                  | 8                    | /                          | /                                      |          | NSAID                                                                     |                                     |        |
| (70) | F,60                | Painful purpuric lesions and palpable papules on the lower limbs                                                                 | 11                   | 2                          | Second                                 | Recovery | Prednisone 60 mg/day for 2 weeks                                          | Oxford-AstraZeneca ChaAdOx1 nCoV-19 |        |
| (71) | F,55                | Palpable purpura over both ankles, that progressed to the lower limb                                                             | 5                    | 2                          | First                                  | Recovery | Prednisolone 0.5 mg/kg/day, for 2 weeks                                   | Oxford-AstraZeneca ChaAdOx1 nCoV-19 |        |
|      | M,48                |                                                                                                                                  | 2                    |                            | First and second                       |          | Topical CS                                                                |                                     |        |
| (72) | F,68                | Erythematous macules on both lower extremities                                                                                   | 2                    | 3                          | First                                  | Recovery | Oral methylprednisolone, colchicine 1.2 mg/day and topical CS for 3 weeks | Oxford-AstraZeneca ChaAdOx1 nCoV-19 |        |
| (73) | M,57                | Erythematous macules on both lower extremities and torso                                                                         | 14                   | 3                          | First                                  | Recovery | Prednisone 1 mg/kg/day for 3 weeks                                        | Oxford-AstraZeneca ChaAdOx1 nCoV-19 |        |
|      | M,58                |                                                                                                                                  | 7                    |                            | 10 days                                |          |                                                                           |                                     | Second |
|      | M,53                |                                                                                                                                  | 6                    |                            | 2                                      |          |                                                                           |                                     | First  |
| (74) | F,62                | Petechial rash on the bilateral lower limb                                                                                       | 7                    | Several                    | First                                  | Recovery | Oral prednisone                                                           | Oxford-AstraZeneca ChaAdOx1 nCoV-19 |        |
| (75) | F,57                | Palpable purpura lesions on the buttocks                                                                                         | 1                    | 1                          | First                                  | Recovery | Only follow-up                                                            | Oxford-AstraZeneca ChaAdOx1 nCoV-19 |        |
| (76) | F,77                | Palpable papules on the lower limb and the hands                                                                                 | 10                   | Several                    | First                                  | Recovery | Oral prednisolone, dapsone 50 mg/day for 60 days                          | Oxford-AstraZeneca ChaAdOx1 nCoV-19 |        |
| (77) | F,71                | Palpable purpuric papules on the legs                                                                                            | 5                    | 2                          | Second                                 | Recovery | Oral prednisone 20 mg/day.                                                | Oxford-AstraZeneca ChaAdOx1 nCoV-19 |        |
| (78) | F,61                | Pruritic erythematous-purpuric macules involving the lower extremities, buttocks, axillae, and lateral aspects of the abdomen    | 5                    | 2                          | First                                  | Recovery | Oral antihistamines and CS                                                | Oxford-AstraZeneca ChaAdOx1 nCoV-19 |        |
| (79) | F,56                | Purpuric rash involving the lower extremities and abdomen                                                                        | 30                   | 9 days                     | First and SARS-CoV-2                   | Death    | Oral CS, norepinephrine, antibiotic and antiviral therapy                 | Oxford-AstraZeneca ChaAdOx1 nCoV-19 |        |

|      |      |                                                                                        |         |         |                         |                    |                                                         |                                     |
|------|------|----------------------------------------------------------------------------------------|---------|---------|-------------------------|--------------------|---------------------------------------------------------|-------------------------------------|
|      |      |                                                                                        |         |         | infection 20 days later |                    |                                                         |                                     |
| (80) | F,64 | Palpable purpuric papules on the lower limbs                                           | 1       | 2       | First                   | Recovery           | Oral antihistamines and topical CS                      | Oxford-AstraZeneca ChaAdOx1 nCoV-19 |
|      | F,44 |                                                                                        | 2       | 3       | Second                  | Recovery           | Oral antihistamines and CS, topical CS                  |                                     |
|      | F,68 |                                                                                        | 9       | 10 days | First                   | Recovery           | Oral antihistamines and CS, topical CS                  |                                     |
|      | F,67 |                                                                                        | 20      | 2       | First                   | Recovery           | Oral antihistamines, CS, and pentoxifylline, topical CS |                                     |
|      | F,59 | Palpable purpuric papules on the lower and upper limbs                                 | 2       | 4 days  | First                   | Partial resolution | Oral antihistamines and CS, topical CS                  |                                     |
| (81) | M,22 | Palpable purpura on the dorsal feet and the both lower extremities                     | 10      | 3       | First                   | Recovery           | Oral antihistamines and local CS                        | Johnson & Johnson Ad26.COV2.S       |
| (82) | M,65 | Pruritic and painful purpuric rash on his left arm, lower extremities, and abdomen     | 7       | 8       | First                   | Recovery           | Prednisone 60 mg/day and topical CS, analgesics         | Johnson & Johnson Ad26.COV2.S       |
| (83) | F,30 | Purpuric and hemorrhagic papules and vesicles on feet, legs and elbows                 | 17      | Several | First                   | Recovery           | Topical CS                                              | Johnson & Johnson Ad26.COV2.S       |
| (84) | F,23 | Erythematous pinpoint purpura on the lower and upper extremities                       | 36      | 4       | First                   | Recovery           | Dexametasone and prednisolone                           | Sinovac CoronaVac                   |
|      | F,26 |                                                                                        | 4 hours |         |                         |                    | Oral colchicine 0.6 mg twice a day and naproxen         |                                     |
| (85) | F,46 | Purpuric papules on the legs                                                           | 5       | 2       | First                   | Recovery           | Systemic antihistamines and local steroid               | Bharat Biotech Covaxin              |
| (86) | M,45 | Papular lesions on upper and lower limbs                                               | 2       | NA      | First                   | Recovery           | Systemic CS                                             | Sinopharm BBiBP-CorV                |
| (87) | F,57 | Palpable purpuric eruption on legs, thighs, buttocks, abdomen, back, and both forearms | 5       | 6       | Second                  | Recovery           | Systemic CS                                             | Sinopharm BBiBP-CorV                |
| (88) | F,83 | Palpable purpura on both hands, legs and thighs                                        | 7       | 2       | Second                  | Recovery           | Oral antibiotic and topical CS                          | Pfizer-BioNTech BNT16B2b2           |

M= male; F= female; NA=not available; CS=corticosteroids.

**Supplementary Table 3. Cases of cutaneous IgA vasculitis caused or reactivated by anti-SARS-CoV-2 vaccination**

| Ref.  | Gender, age (years) | Clinical findings                                                                                                                                           | Time to reaction (days) | Time to resolution (weeks) | Which dose                                              | Outcome            | Treatment                                  | Vaccine type                        |
|-------|---------------------|-------------------------------------------------------------------------------------------------------------------------------------------------------------|-------------------------|----------------------------|---------------------------------------------------------|--------------------|--------------------------------------------|-------------------------------------|
| (58)  | F,17                | Palpable purpura on both arms and legs                                                                                                                      | 10                      | 4                          | First dose                                              | Recovery           | Systemic antihistamines and local steroid  | Pfizer-BioNTech BNT16B2b2           |
| (90)  | F,40                | Gluteal region rash (no biopsy)                                                                                                                             | 20                      | 1                          | Second dose                                             | Recovery           | Only follow-up                             | Pfizer-BioNTech BNT16B2b2           |
| (91)  | M,23                | Palpable purpuric rash on the extremities and trunk (no biopsy, previous IgA vasculitis)                                                                    | 1                       | 2                          | Second dose                                             | Recovery           | Prednisone 20 mg/day for 2 weeks           | Pfizer-BioNTech BNT16B2b2           |
| (92)  | F,70                | Palpable purpura on the feet                                                                                                                                | 2                       | 3                          | Second dose                                             | Recovery           | Only follow-up                             | Pfizer-BioNTech BNT16B2b2           |
| (93)  | F,45                | Palpable purpura on the feet (no biopsy, previous Henoch-Schonlein purpura)                                                                                 | 1                       | 4                          | Second dose (reported also 6 days after the third dose) | Recovery           | Only follow-up                             | Pfizer-BioNTech BNT16B2b2           |
| (94)  | M,34                | Widespread palpable purpura                                                                                                                                 | 7                       | 2                          | Second dose                                             | Recovery           | Prednisolone 40 mg/day                     | Pfizer-BioNTech BNT16B2b2           |
| (95)  | F,78                | Palpable purpura on the hips and lower limbs (no biopsy, previous IgA vasculitis with leukocytoclastic aspects, and renal and gastrointestinal involvement) | 7                       | 2                          | First dose                                              | Recovery           | Methylprednisolone 1 mg/kg/day for 2 weeks | Moderna mRNA-1273                   |
| (96)  | M,94                | Palpable purpura on the waist                                                                                                                               | 10                      | Several                    | Second dose                                             | Recovery           | Prednisone 60 mg/day for 3 weeks           | Moderna mRNA-1273                   |
| (97)  | F,76                | Maculopapular purpuric rash on gluteal and leg regions                                                                                                      | 7                       | 3                          | First dose                                              | Recovery           | Deflazacort 30 mg/day for 10 days          | Oxford-AstraZeneca ChaAdOx1 nCoV-19 |
| (98)  | M,62                | Petechial purpuric rash involving both legs                                                                                                                 | 8                       | 1                          | First dose                                              | Recovery           | Prednisone 40 mg/day for 7 days            | Oxford-AstraZeneca ChaAdOx1 nCoV-19 |
| (99)  | M,72                | Maculopapular rash lower limbs                                                                                                                              | 15                      | Several                    | First dose                                              | Recovery           | Prednisone 40 mg/day for 3 weeks           | Oxford-AstraZeneca ChaAdOx1 nCoV-19 |
| (100) | M,33                | Erythematous macules and palpable papules on the legs, forearms                                                                                             | 3                       | 2                          | First dose (previous infection 3 months before)         | Partial resolution | Topical CS cream                           | Sinovac CoronaVac                   |

M= male; F= female; NA= not available; CS=corticosteroids.

**Supplementary Table 4. Cases of cutaneous lymphocytic vasculitis caused by anti-SARS-CoV-2 vaccination**

| Ref.  | Gender, age (years) | Clinical findings                                   | Time to reaction | Time to resolution | Which dose                            | Outcome  | Treatment                           | Vaccine type                                                                   |
|-------|---------------------|-----------------------------------------------------|------------------|--------------------|---------------------------------------|----------|-------------------------------------|--------------------------------------------------------------------------------|
| (102) | F,51                | Maculopapular rash on upper limbs and trunk         | 1 day            | 2 weeks            | First (previous SARS-CoV-2 infection) | Recovery | Systemic antihistamine and local CS | Pfizer-BioNTech BNT16B2b2                                                      |
| (103) | M,64                | Maculopapular rash on the limbs and trunk           | 3 days           | 2 weeks            | Second                                | Recovery | Only follow-up                      | Oxford-AstraZeneca ChaAdOx1 nCoV-19                                            |
| (104) | F,31                | Purpuric lesions on her legs                        | 4 days           | 1 week             | First and second                      | Recovery | Systemic antihistamines             | Bharat Biotech Covaxin                                                         |
| (105) | M,16                | maculo-papular rash on the lower limbs and forearms | 3 days           | 2 weeks            | Third                                 | Recovery | Only follow-up                      | Pfizer-BioNTech BNT16B2b2 first and second dose, mR NA-1273 Moderna third dose |

M= male; F= female; NA= not available

**Supplementary Table 5. Cases of urticarial vasculitis caused by anti-SARS-CoV-2 vaccination**

| Ref.  | Gender, age (years) | Clinical findings                                 | Time to reaction (days) | Time to resolution (weeks) | Which dose | Outcome  | Treatment                                                | Vaccine type                           |
|-------|---------------------|---------------------------------------------------|-------------------------|----------------------------|------------|----------|----------------------------------------------------------|----------------------------------------|
| (106) | F,27                | Maculopapular rash on both hands, legs and trunk  | 10                      | 8                          | First      | Recovery | Systemic methylprednisolone                              | Moderna mRNA-1273                      |
| (100) | F,35                | Palpable purpura on both hands, legs and thighs   | 1                       | Several                    | First      | Recovery | Systemic antihistamines, methylprednisolone, and dapsone | Moderna mRNA-1273                      |
| (107) | M,78                | Urticarial plaques over the extremities           | 7                       | 4                          | First      | Recovery | Oral methylprednisolone                                  | Oxford-AstraZeneca<br>ChaAdOx1 nCoV-19 |
| (108) | M,27                | Urticarial plaques over the trunk and extremities | 7                       | 1                          | Second     | Recovery | Oral indomethacin 75 mg/day and oral antihistamines      | Sinovac CoronaVac                      |

M= male; F= female; NA= not available

**Supplementary Table 6. Cases of ANCA-associated vasculitis and other unclassifiable forms caused by anti-SARS-CoV-2 vaccination**

| Ref.  | Gender, age (years) | Clinical findings                                                                                                                                   | Type of vasculitis                                                                                                                                            | Time to reaction (days) | Time to resolution (weeks) | Which dose | Outcome            | Treatment                                             | Vaccine type              |
|-------|---------------------|-----------------------------------------------------------------------------------------------------------------------------------------------------|---------------------------------------------------------------------------------------------------------------------------------------------------------------|-------------------------|----------------------------|------------|--------------------|-------------------------------------------------------|---------------------------|
| (109) | F,37                | Erythema on forearms, thighs, forehead one ear                                                                                                      | ANCA-associated vasculitis                                                                                                                                    | 12                      | 3                          | First      | Partial resolution | Prednisolone 30 mg/day for 3 weeks                    | Pfizer-BioNTech BNT16B2b2 |
| (111) | F,64                | Purpuric rash on the legs and necrosis of fingertips (previous history of Raynaud's phenomenon, Sjogren's syndrome and leukocytoclastic vasculitis) | Leukocytoclastic vasculitis and type II cryoglobulinemia vasculitis in the context of systemic lupus erythematosus (SLE) and antiphospholipid syndrome (APS). | 17                      | 10                         | First      | Recovery           | Oral steroid, heparin, epoprostenol, plasma exchange. | Pfizer-BioNTech BNT16B2b2 |

M= male; F= female; NA= not available
